# Supplementary material for: Epigenetic Control of Effector Gene Expression in the Plant Pathogenic Fungus Leptosphaeria maculans
Source: PubMed Central journal article supplement (PMC3945186; doi:10.1371/journal.pgen.1004227), 2014-03-06
Supplement: pgen.1004227.s005.pdf [file pgen.1004227.s005.pdf]

**Table S4.** List of *L. maculans* genes up-regulated in a silenced-*LmHP1* background

| SEQ_ID <sup>a</sup>                | Fold<br>change <sup>b</sup> | Location <sup>c</sup> | Function                                                       |
|------------------------------------|-----------------------------|-----------------------|----------------------------------------------------------------|
| lmctg_1214_v2_egn4_Lema_P086290.1  | 8.80                        | AT-HB                 | AvrLm4-7                                                       |
| lmctg_1031_v2_egn4_Lema_P076380.1  | 8.72                        | AT-B                  | putative SSP-encoding<br>gene                                  |
| AT10_ext_SuperContig_10_G00134     | 7.74                        | AT-HB                 | putative SSP-encoding<br>gene                                  |
| lmctg_0001_v2_T000001              | 6.65                        | AT-HB                 | putative SSP-encoding<br>gene                                  |
| lmctg_1143_v2_egn4_Lema_uP081640.1 | 6.17                        | GC                    | putative SSP-encoding<br>gene                                  |
| AT15_ext_SuperContig_5_3           | 5.97                        | AT-HB                 | putative SSP-encoding<br>gene                                  |
| lmctg_1325_v2_egn4_Lema_P095680.1  | 5.75                        | GC                    | similar to cytochrome P450                                     |
| AvrLm1                             | 5.60                        | AT-HB                 | AvrLm1                                                         |
| lmctg_0898_v2_T000001              | 5.31                        | AT-HB                 | putative SSP-encoding<br>gene                                  |
| lmctg_1187_v2_egn4_Lema_P084060.1  | 5.31                        | GC                    | similar to NRPS-like<br>enzyme                                 |
| lmctg_0787_v2_egn4_Lema_P059000.1  | 5.29                        | GC                    | similar to beta-glucosidase                                    |
| lmctg_1149_v2_egn4_Lema_P081940.1  | 5.02                        | GC                    | similar to aspartate<br>aminotransferase                       |
| lmctg_1149_v2_egn4_Lema_P081950.1  | 5.00                        | GC                    | similar to nor-1                                               |
| lmctg_1228_v2_T000001              | 4.62                        | AT-B                  | putative SSP-encoding<br>gene                                  |
| lmctg_1149_v2_egn4_Lema_P082020.1  | 4.16                        | GC                    | similar to o-<br>methyltransferase                             |
| lmctg_1149_v2_egn4_Lema_P082010.1  | 4.12                        | GC                    | similar to protein TOXD                                        |
| lmctg_1306_v2_egn4_Lema_P093380.1  | 4.11                        | GC                    | similar to meiotic<br>recombination protein<br>dmc1            |
| lmctg_1587_v2_egn4_Lema_uP119060.1 | 4.05                        | AT-HB                 | AvrLm11                                                        |
| lmctg_0758_v2_egn4_Lema_P058140.1  | 3.77                        | AT-B                  | similar to transporter                                         |
| lmctg_0329_v2_egn4_Lema_uP023430.1 | 3.75                        | AT-HB                 | putative SSP-encoding<br>gene                                  |
| lmctg_0245_v2_egn4_Lema_P019510.1  | 3.56                        | GC                    | similar to putative short-<br>chain<br>dehydrogenase/reductase |
| lmctg_1259_v2_egn4_Lema_P091280.1  | 3.42                        | GC                    | similar to ribonuclease H                                      |
| AT11_ext_SuperContig_12_8          | 3.42                        | AT-B                  | putative SSP-encoding<br>gene                                  |

|                                   |      |       |                                                                   |
|-----------------------------------|------|-------|-------------------------------------------------------------------|
| lmctg_0569_v2_egn4_Lema_P040170.1 | 3.40 | AT-B  | similar to proline oxidase                                        |
| lmctg_0901_v2_egn4_Lema_P068810.1 | 3.35 | GC    | similar to high-affinity methionine permease                      |
| lmctg_0873_v2_T000014             | 3.26 | GC    | similar to Zn-dependent hydrolases of the beta-lactamase fold     |
| lmctg_0978_v2_egn4_Lema_P074930.1 | 3.10 | GC    | putative SSP-encoding gene                                        |
| AT01_ext_SuperContig_0_1          | 3.06 | AT-HB | putative SSP-encoding gene                                        |
| lmctg_0810_v2_egn4_Lema_P060230.1 | 3.05 | GC    | similar to monosaccharide transporter                             |
| lmctg_0635_v2_egn4_Lema_P047750.1 | 3.02 | GC    | similar to pectinesterase                                         |
| lmctg_1487_v2_egn4_Lema_P110770.1 | 3.00 | AT-B  | similar to transporter                                            |
| lmctg_1229_v2_egn4_Lema_P086540.1 | 3.00 | AT-HB | similar to Six5                                                   |
| lmctg_1149_v2_egn4_Lema_P081930.1 | 2.98 | GC    | similar to salicylate hydroxylase                                 |
| lmctg_0105_v2_egn2_Lema_P012060.1 | 2.97 | AT-HB | putative SSP-encoding gene                                        |
| lmctg_1246_v2_egn4_Lema_P089620.1 | 2.95 | GC    | similar to NADP-dependent leukotriene B4 12-hydroxydehydrogenase  |
| lmctg_0901_v2_egn4_Lema_P068620.1 | 2.95 | GC    | similar to hemolysin-III family protein                           |
| lmctg_1547_v2_egn4_Lema_P116280.1 | 2.87 | GC    | similar to phosphoglycerate mutase                                |
| lmctg_0548_v2_egn4_Lema_P035480.1 | 2.84 | GC    | similar to DNA mismatch repair protein mlh1                       |
| lmctg_0252_v2_egn4_Lema_P019640.1 | 2.80 | GC    | similar to carbonic anhydrase                                     |
| lmctg_1253_v2_egn4_Lema_P090430.1 | 2.79 | GC    | similar to sulfate permease                                       |
| lmctg_0433_v2_egn4_Lema_P028910.1 | 2.75 | GC    | similar to short-chain dehydrogenase/reductase                    |
| lmctg_0532_v2_egn4_Lema_P033090.1 | 2.71 | AT-B  | putative SSP-encoding gene                                        |
| lmctg_0122_v2_egn4_Lema_P013520.1 | 2.71 | GC    | candidate b-fructosidase                                          |
| lmctg_1477_v2_egn4_Lema_P108350.1 | 2.60 | GC    | similar to dimethylglycine dehydrogenase, mitochondrial precursor |
| lmctg_1149_v2_egn4_Lema_P081920.1 | 2.59 | GC    | similar to polyketide synthase                                    |
| lmctg_0620_v2_egn4_Lema_P046190.1 | 2.58 | GC    | candidate endo-1,4-b-glucanase                                    |
| lmctg_1259_v2_egn4_Lema_P091270.1 | 2.57 | GC    | candidate cell-wall active enzyme                                 |

|                                    |      |               |                                                                                      |
|------------------------------------|------|---------------|--------------------------------------------------------------------------------------|
| lmctg_0876_v2_egn4_Lema_P063470.1  | 2.57 | GC            | similar to CoA ligase                                                                |
| lmctg_1616_v2_egn4_Lema_P122130.1  | 2.50 | AT-B          | candidate<br>glycosyltransferase related<br>to Dol-P-Man: a-<br>mannosyltransferases |
| lmctg_0885_v2_egn4_Lema_P065240.1  | 2.47 | GC            | similar to short-chain<br>dehydrogenase                                              |
| lmctg_1524_v2_egn4_Lema_P113920.1  | 2.47 | GC            | similar to FAD binding<br>oxidoreductase                                             |
| lmctg_1253_v2_egn4_Lema_P090600.1  | 2.45 | GC            | similar to aldehyde<br>dehydrogenase                                                 |
| lmctg_1149_v2_egn4_Lema_P082000.1  | 2.45 | GC            | similar to short chain<br>dehydrogenase                                              |
| lmctg_0898_v2_egn4_Lema_uP067380.1 | 2.43 | GC            | putative SSP-encoding<br>gene                                                        |
| lmctg_0448_v2_egn4_Lema_uP030130.1 | 2.41 | GC            | putative SSP-encoding<br>gene                                                        |
| lmctg_1522_v2_egn4_Lema_P113200.1  | 2.41 | GC-<br>island | putative SSP-encoding<br>gene                                                        |
| lmctg_1464_v2_egn4_Lema_P106060.1  | 2.41 | GC            | putative SSP-encoding<br>gene                                                        |
| lmctg_0597_v2_egn4_Lema_P043790.1  | 2.35 | GC            | similar to glutathione S-<br>transferase                                             |
| lmctg_0701_v2_egn4_Lema_P051060.1  | 2.34 | GC            | candidate b-glycosidase<br>related to xylanases                                      |
| lmctg_0876_v2_egn4_Lema_P063460.1  | 2.33 | GC            | similar to thioesterase<br>family protein                                            |
| lmctg_1611_v2_egn4_Lema_P121290.1  | 2.32 | GC            | similar to RING and UBP<br>finger domain protein                                     |
| lmctg_0810_v2_egn4_Lema_P060220.1  | 2.32 | GC            | similar to sugar transporter                                                         |
| lmctg_0207_v2_egn4_Lema_P017440.1  | 2.30 | GC            | similar to ATP-dependent<br>RNA helicase dbp8                                        |
| lmctg_0610_v2_egn4_Lema_P045240.1  | 2.28 | GC            | similar to oxidase                                                                   |
| lmctg_0351_v2_egn4_Lema_P024830.1  | 2.24 | GC            | similar to origin recognition<br>complex subunit 3                                   |
| lmctg_1248_v2_egn4_Lema_P089820.1  | 2.21 | GC            | similar to membrane<br>protein                                                       |
| lmctg_1489_v2_egn4_Lema_P111290.1  | 2.20 | GC            | similar to zinc-binding<br>oxidoreductase ToxD                                       |
| lmctg_0607_v2_egn4_Lema_P044980.1  | 2.19 | GC            | similar to branched-chain-<br>amino-acid<br>aminotransferase                         |
| lmctg_0816_v2_egn4_Lema_P060550.1  | 2.18 | GC            | similar to MFS<br>monocarboxylate<br>transporter                                     |

|                                    |      |       |                                                        |
|------------------------------------|------|-------|--------------------------------------------------------|
| lmctg_1452_v2_egn4_Lema_P103620.1  | 2.17 | GC    | similar to zinc-binding oxidoreductase ToxD            |
| lmctg_0901_v2_egn4_Lema_P068610.1  | 2.16 | GC    | similar to indole-diterpene biosynthesis protein PaxU  |
| lmctg_1148_v2_egn4_Lema_P081840.1  | 2.15 | GC    | similar to gliotoxin biosynthesis protein GliK         |
| lmctg_0347_v2_egn4_Lema_P024250.1  | 2.14 | GC    | similar to mechanosensitive ion channel family protein |
| lmctg_1545_v2_egn4_Lema_P116080.1  | 2.13 | GC    | similar to MFS sugar transporter                       |
| lmctg_1346_v2_egn4_Lema_P099100.1  | 2.12 | GC    | similar to pectate lyase                               |
| lmctg_1451_v2_egn4_Lema_P103310.1  | 2.12 | GC    | candidate b-1,4-xylanase                               |
| lmctg_0444_v2_egn4_Lema_P030050.1  | 2.11 | GC    | similar to nitrilase                                   |
| lmctg_1523_v2_egn4_Lema_P113300.1  | 2.10 | GC    | similar to phosphoadenosine phosphosulfate reductase   |
| lmctg_0034_v2_egn4_Lema_uP003730.1 | 2.09 | GC    | putative SSP-encoding gene                             |
| lmctg_0440_v2_egn4_Lema_P029410.1  | 2.07 | GC    | similar to polysaccharide deacetylase family protein   |
| lmctg_0372_v2_egn4_Lema_P025790.1  | 2.07 | GC    | similar to cystathionine-gamma-lyase                   |
| lmctg_0113_v2_egn4_Lema_P012870.1  | 2.06 | GC    | similar to stress responsive A/B barrel domain protein |
| lmctg_1089_v2_egn4_Lema_P078840.1  | 2.06 | GC    | similar to glutamate-cysteine ligase                   |
| lmctg_0567_v2_egn4_Lema_P039550.1  | 2.06 | GC    | similar to citrate synthase                            |
| lmctg_1245_v2_T000037              | 2.06 | GC    | similar to aldehyde reductase                          |
| lmctg_0635_v2_egn4_Lema_P047780.1  | 2.03 | GC    | similar to diene lactone hydrolase family protein      |
| lmctg_0950_v2_egn4_Lema_P074030.1  | 2.03 | GC    | similar to riboflavin synthase                         |
| lmctg_0750_v2_egn4_Lema_P057790.1  | 2.02 | GC    | similar to gi 215261417 pdb 3F4A  A Chain A            |
| lmctg_1256_v2_egn4_Lema_P090870.1  | 2.01 | GC    | similar to acyl-coa dehydrogenase                      |
| lmctg_0398_v2_egn4_Lema_P027290.1  | 2.01 | GC    | similar to acetyl-CoA acetyltransferase                |
| lmctg_1467_v2_egn4_Lema_P106940.1  | 2.01 | AT-HB | putative SSP-encoding gene                             |
| lmctg_1633_v2_T000001              | 2.00 | AT-B  | putative SSP-encoding gene                             |
| lmctg_1525_v2_egn4_Lema_P114770.1  | 1.98 | AT-B  | similar to amidohydrolase                              |

|                                    |      |      |                                                                                  |
|------------------------------------|------|------|----------------------------------------------------------------------------------|
| lmctg_0089_v2_egn4_Lema_P009780.1  | 1.94 | GC   | putative SSP-encoding gene                                                       |
| lmctg_0510_v2_egn4_Lema_P032600.1  | 1.93 | AT-B | similar to subtilisin-like protease                                              |
| lmctg_1432_v2_egn4_Lema_P102280.1  | 1.92 | GC   | similar to DNA mismatch repair protein msh3                                      |
| lmctg_1147_v2_egn4_Lema_P081800.1  | 1.91 | GC   | similar to cytochrome P450                                                       |
| lmctg_0901_v2_T000097              | 1.91 | GC   | similar to oxidoreductase                                                        |
| lmctg_1324_v2_egn4_Lema_P095110.1  | 1.90 | GC   | putative SSP-encoding gene                                                       |
| lmctg_0732_v2_egn4_Lema_P056280.1  | 1.90 | GC   | similar to elongin C                                                             |
| lmctg_0885_v2_egn4_Lema_P065260.1  | 1.89 | GC   | distantly related to cell-wall active enzymes                                    |
| lmctg_1147_v2_egn4_Lema_uP081770.1 | 1.89 | GC   | similar to cytochrome P450 monooxygenase                                         |
| lmctg_0632_v2_egn4_Lema_P047320.1  | 1.89 | GC   | putative SSP-encoding gene                                                       |
| lmctg_1451_v2_egn4_Lema_P103300.1  | 1.88 | GC   | putative SSP-encoding gene                                                       |
| lmctg_0567_v2_egn4_Lema_P039540.1  | 1.88 | GC   | similar to isocitrate lyase                                                      |
| lmctg_0471_v2_egn4_Lema_P031200.1  | 1.88 | GC   | similar to nitroreductase family protein                                         |
| lmctg_0373_v2_egn4_Lema_P025890.1  | 1.87 | GC   | candidate glycosyltransferase related to Dol-P-Man: a-mannosyltransferases       |
| lmctg_0649_v2_egn4_Lema_P048770.1  | 1.87 | GC   | similar to serine/threonine protein kinase                                       |
| lmctg_0728_v2_egn4_Lema_uP055400.1 | 1.86 | GC   | putative SSP-encoding gene                                                       |
| lmctg_1523_v2_egn4_Lema_P113240.1  | 1.86 | AT-B | similar to onanonoxo-7-onima-8-eninoihtemlysoneda                                |
| lmctg_1296_v2_egn4_Lema_P092560.1  | 1.86 | GC   | similar to 5-methyltetrahydropteroyltri glutamate-homocysteine methyltransferase |
| lmctg_0498_v2_egn4_Lema_P032300.1  | 1.85 | GC   | candidate b-1,4-mannanase                                                        |
| lmctg_0869_v2_egn4_Lema_P062660.1  | 1.85 | GC   | similar to peptidyl-prolyl-cis-trans isomerase                                   |
| lmctg_0346_v2_egn4_Lema_P024090.1  | 1.85 | GC   | similar to aromatic aminotransferase Aro8                                        |
| lmctg_1461_v2_egn4_Lema_P105130.1  | 1.85 | GC   | similar to zinc-binding oxidoreductase                                           |

|                                   |      |      |                                                           |
|-----------------------------------|------|------|-----------------------------------------------------------|
| lmctg_1261_v2_egn4_Lema_P091390.1 | 1.84 | GC   | similar to DNA repair protein rad50                       |
| lmctg_1477_v2_egn4_Lema_P108520.1 | 1.84 | GC   | similar to DNA repair protein rad5                        |
| lmctg_1336_v2_egn4_Lema_P098690.1 | 1.83 | GC   | similar to HIT domain protein                             |
| lmctg_1220_v2_egn4_Lema_P086490.1 | 1.83 | GC   | similar to fumarylacetoacetate hydrolase family protein   |
| lmctg_0093_v2_egn4_Lema_P011090.1 | 1.83 | GC   | similar to succinyl-CoA:3-ketoacid-coenzyme A transferase |
| lmctg_0732_v2_egn4_Lema_P056290.1 | 1.83 | AT-B | similar to membrane protein                               |
| lmctg_1428_v2_egn4_Lema_P102050.1 | 1.82 | GC   | similar to F-box domain-containing protein                |
| lmctg_1148_v2_egn4_Lema_P081850.1 | 1.81 | GC   | similar to dipeptidase                                    |
| lmctg_0882_v2_egn4_Lema_P064920.1 | 1.80 | GC   | similar to quinate transporter                            |
| lmctg_0556_v2_egn4_Lema_P037110.1 | 1.80 | GC   | similar to quinone oxidoreductase                         |
| lmctg_1104_v2_egn4_Lema_P079710.1 | 1.79 | GC   | similar to ssDNA binding protein Ssb3                     |
| lmctg_1326_v2_egn4_Lema_P096950.1 | 1.79 | GC   | similar to Taurine catabolism dioxygenase TauD            |
| lmctg_1148_v2_egn4_Lema_P081820.1 | 1.79 | GC   | similar to cytochrome P450                                |
| lmctg_1524_v2_egn4_Lema_P113510.1 | 1.79 | GC   | similar to enoyl-CoA hydratase                            |
| lmctg_0052_v2_egn4_Lema_P005360.1 | 1.78 | GC   | similar to 2-oxoisovalerate dehydrogenase subunit alpha   |
| lmctg_1532_v2_egn4_Lema_P115030.1 | 1.78 | GC   | similar to cupin 2 domain-containing protein              |
| lmctg_0800_v2_egn4_Lema_P059520.1 | 1.77 | GC   | similar to cytochrome P450                                |
| lmctg_1462_v2_egn4_Lema_P105260.1 | 1.77 | GC   | similar to nucleolar complex-associated protein           |
| lmctg_0704_v2_egn4_Lema_P051840.1 | 1.77 | GC   | similar to DNA ligase                                     |
| lmctg_1498_v2_egn4_Lema_P111680.1 | 1.77 | GC   | similar to 5'-nucleotidase protein                        |
| lmctg_0557_v2_egn4_Lema_P037220.1 | 1.75 | GC   | similar to enoyl-CoA hydratase/isomerase                  |
| lmctg_1466_v2_egn4_Lema_P106390.1 | 1.75 | GC   | similar to electron transfer flavoprotein                 |
| lmctg_0745_v2_egn4_Lema_P057030.1 | 1.74 | GC   | similar to TPA: ER glycosyl hydrolase (Edem)              |

|                                   |      |      |                                                       |
|-----------------------------------|------|------|-------------------------------------------------------|
| lmctg_0693_v2_egn4_Lema_P050560.1 | 1.74 | GC   | similar to DNA repair protein Rad51                   |
| lmctg_1350_v2_egn4_Lema_P099380.1 | 1.74 | GC   | similar to aldose reductase                           |
| lmctg_0066_v2_egn4_Lema_P006890.1 | 1.73 | GC   | similar to thioredoxin                                |
| lmctg_0186_v2_egn4_Lema_P016230.1 | 1.73 | GC   | similar to glucose-6-phosphate 1-epimerase            |
| lmctg_1524_v2_egn4_Lema_P114440.1 | 1.73 | GC   | similar to anaphase-promoting complex subunit         |
| lmctg_0854_v2_egn4_Lema_P061990.1 | 1.72 | GC   | similar to enoyl-CoA hydratase                        |
| lmctg_0595_v2_egn4_Lema_P043580.1 | 1.71 | GC   | similar to structural maintenance of chromosomes 5    |
| lmctg_0469_v2_egn4_Lema_P031000.1 | 1.71 | GC   | similar to NAD-specific glutamate dehydrogenase       |
| lmctg_0718_v2_egn4_Lema_P053940.1 | 1.70 | GC   | similar to methylene-fatty-acyl-phospholipid synthase |
| lmctg_0352_v2_egn4_Lema_P025010.1 | 1.70 | GC   | similar to carboxymethylenebutenolide dase            |
| lmctg_0217_v2_egn4_Lema_P017870.1 | 1.69 | GC   | similar to Fungal specific transcription factor       |
| lmctg_1212_v2_egn4_Lema_P085920.1 | 1.69 | GC   | putative SSP-encoding gene                            |
| lmctg_0915_v2_egn4_Lema_P072650.1 | 1.69 | GC   | similar to glutathione S-transferase                  |
| lmctg_1467_v2_egn4_Lema_P106620.1 | 1.68 | GC   | similar to amino acid permease                        |
| lmctg_0016_v2_egn4_Lema_P000970.1 | 1.68 | GC   | similar to NADP-dependent alcohol dehydrogenase       |
| lmctg_1331_v2_egn4_Lema_P097850.1 | 1.67 | GC   | similar to ran-binding protein                        |
| lmctg_0101_v2_egn4_Lema_P012020.1 | 1.66 | AT-B | similar to ATP-dependent RNA helicase dbp9            |
| lmctg_0878_v2_egn4_Lema_P063830.1 | 1.66 | GC   | similar to beta-glucosidase                           |
| lmctg_1667_v2_egn4_Lema_P124520.1 | 1.66 | GC   | similar to norsolorinic acid reductase                |
| lmctg_1621_v2_egn4_Lema_P122980.1 | 1.64 | GC   | similar to helicase                                   |
| lmctg_0014_v2_egn4_Lema_P000850.1 | 1.63 | GC   | similar to D-tyrosyl-tRNA(Tyr) deacylase              |
| lmctg_0441_v2_egn4_Lema_P029550.1 | 1.63 | GC   | similar to carboxylesterase                           |
| lmctg_0490_v2_egn4_Lema_P031800.1 | 1.63 | GC   | similar to glutathione S-transferase                  |
| lmctg_1148_v2_egn4_Lema_P081860.1 | 1.63 | GC   | similar to aminotransferase                           |
| lmctg_0553_v2_egn4_Lema_P036430.1 | 1.62 | GC   | similar to protein RTM1                               |

|                                   |      |    |                                                            |
|-----------------------------------|------|----|------------------------------------------------------------|
| lmctg_0279_v2_egn4_Lema_P021480.1 | 1.62 | GC | similar to DNA-directed RNA polymerase I complex (subunit) |
| lmctg_0112_v2_egn4_Lema_P012740.1 | 1.61 | GC | putative SSP-encoding gene                                 |
| lmctg_0163_v2_egn4_Lema_P015520.1 | 1.61 | GC | similar to aldehyde reductase I                            |
| lmctg_0757_v2_egn4_Lema_P058110.1 | 1.60 | GC | similar to amino acid permease                             |
| lmctg_1453_v2_egn4_Lema_P103800.1 | 1.60 | GC | similar to homoserine-O-acetyltransferase                  |
| lmctg_1317_v2_egn4_Lema_P093910.1 | 1.60 | GC | similar to dihydrodipicolinate synthetase family protein   |
| lmctg_0848_v2_egn4_Lema_P061720.1 | 1.60 | GC | similar to thioesterase family protein                     |
| lmctg_1106_v2_egn4_Lema_P079850.1 | 1.59 | GC | similar to rhomboid family membrane protein                |
| lmctg_0901_v2_egn4_Lema_P068910.1 | 1.59 | GC | similar to nicotinamidase                                  |
| lmctg_0016_v2_egn4_Lema_P001150.1 | 1.59 | GC | similar to C-1-tetrahydrofolate synthase                   |
| lmctg_0468_v2_egn4_Lema_P030960.1 | 1.59 | GC | similar to S-adenosylmethionine synthetase                 |
| lmctg_0941_v2_egn4_Lema_P073690.1 | 1.59 | GC | similar to DNA repair protein Nse1                         |
| lmctg_0907_v2_egn4_Lema_P071280.1 | 1.59 | GC | similar to arsenite-translocating ATPase                   |
| lmctg_1489_v2_egn4_Lema_P111000.1 | 1.58 | GC | putative SSP-encoding gene                                 |
| lmctg_1500_v2_egn4_Lema_P111920.1 | 1.58 | GC | similar to feruloyl esterase                               |
| lmctg_1556_v2_egn4_Lema_P116820.1 | 1.58 | GC | similar to ATP-dependent DNA helicase                      |
| lmctg_0440_v2_egn4_Lema_P029440.1 | 1.57 | GC | similar to xanthine dehydrogenase                          |
| lmctg_0618_v2_egn4_Lema_P045960.1 | 1.57 | GC | similar to methionine synthase                             |
| lmctg_0542_v2_egn4_Lema_P034350.1 | 1.57 | GC | similar to thiamin pyrophosphokinase                       |
| lmctg_1453_v2_egn4_Lema_P103830.1 | 1.56 | GC | similar to pyrroline-5-carboxylate reductase               |
| lmctg_0404_v2_egn4_Lema_P028030.1 | 1.56 | GC | candidate glycosidase related to chitinases                |
| lmctg_0746_v2_egn4_Lema_P057190.1 | 1.56 | GC | similar to oxidoreductase                                  |
| lmctg_1147_v2_egn4_Lema_P081810.1 | 1.56 | GC | similar to NRPS-like enzyme                                |



|                                   |      |    |                                                                                  |
|-----------------------------------|------|----|----------------------------------------------------------------------------------|
| lmctg_0244_v2_egn4_Lema_P019460.1 | 1.55 | GC | similar to putative lipase                                                       |
| lmctg_0284_v2_egn4_Lema_P021940.1 | 1.55 | GC | similar to acyl-CoA dehydrogenase                                                |
| lmctg_0305_v2_egn4_Lema_P022710.1 | 1.54 | GC | similar to cyclopropane-fatty-acyl-phospholipid synthase                         |
| lmctg_0545_v2_egn4_Lema_P035250.1 | 1.54 | GC | similar to ubiquitin C-terminal hydrolase L3                                     |
| lmctg_0899_v2_egn4_Lema_P067630.1 | 1.54 | GC | similar to peptidyl-prolyl cis-trans isomerase/cyclophilin                       |
| lmctg_0236_v2_egn4_Lema_P018900.1 | 1.54 | GC | putative SSP-encoding gene                                                       |
| lmctg_0068_v2_egn4_Lema_P007230.1 | 1.54 | GC | similar to ATP-dependent RNA helicase dbp3                                       |
| lmctg_0180_v2_egn4_Lema_P016160.1 | 1.54 | GC | similar to gamma-glutamyltranspeptidase                                          |
| lmctg_0876_v2_egn4_Lema_P063220.1 | 1.53 | GC | similar to 2-hydroxychromene-2-carboxylate isomerase                             |
| lmctg_0150_v2_egn4_Lema_P015230.1 | 1.53 | GC | similar to cytoplasm protein                                                     |
| lmctg_0545_v2_egn4_Lema_P035210.1 | 1.53 | GC | similar to DNA polymerase delta subunit 4                                        |
| lmctg_0915_v2_egn4_Lema_P072530.1 | 1.52 | GC | similar to uridine nucleosidase                                                  |
| lmctg_1568_v2_egn4_Lema_P117610.1 | 1.52 | GC | similar to DSBA oxidoreductase                                                   |
| lmctg_0293_v2_egn4_Lema_P022300.1 | 1.52 | GC | similar to pyridoxine biosynthesis protein PDX1                                  |
| lmctg_0374_v2_egn4_Lema_P025910.1 | 1.51 | GC | similar to aminoglycoside phosphotransferase                                     |
| lmctg_0904_v2_egn4_Lema_P070220.1 | 1.51 | GC | similar to MFS transporter                                                       |
| lmctg_1580_v2_egn4_Lema_P118540.1 | 1.51 | GC | similar to translin-associated factor X                                          |
| lmctg_0390_v2_egn4_Lema_P026890.1 | 1.50 | GC | similar to voltage-gated potassium channel subunit beta-1 channel subunit beta-1 |
| lmctg_0232_v2_egn4_Lema_P018660.1 | 1.50 | GC | similar to Ricin B lectin                                                        |

<sup>a</sup> Only genes with a predicted or known function are presented.

<sup>b</sup> Genes with more than 1.5-fold change in transcript level and an associated *p* value < 0.05 were considered as significantly up-regulated in the silenced-*LmHP1* transformant compared to the wild type v23.1.3 isolate in axenic culture.

<sup>c</sup> GC refers to GC-isochores; AT-HB refers to AT-isochores; AT-B refers to 859 ( $\pm 385$ ) bp transition regions between AT-isochores and GC-isochores; GC-islands refer to regions of more than 1 kb within AT-isochores with a GC content > 50%.
