# Supplementary material for: Epigenetic Control of Effector Gene Expression in the Plant Pathogenic Fungus Leptosphaeria maculans
Source: PubMed Central journal article supplement (PMC3945186; doi:10.1371/journal.pgen.1004227), 2014-03-06
Supplement: pgen.1004227.s006.pdf [file pgen.1004227.s006.pdf]

**Table S5.** List of genes up-regulated in both a silenced-*LmDIM5* and in a silenced-*LmHP1* background

| SEQ_ID                             | Fold<br>change in<br>silenced-<br><i>LmHP1</i> <sup>a,b</sup> | Fold<br>change in<br>silenced-<br><i>LmDIM5</i><br><sub>a,b</sub> | Location<br><sup>c</sup> | Function                   |
|------------------------------------|---------------------------------------------------------------|-------------------------------------------------------------------|--------------------------|----------------------------|
| lmctg_0001_v2_T000001              | 6.65                                                          | 77.16                                                             | AT-HB                    | putative SSP-encoding gene |
| lmctg_1539_v2_T000001              | 13.80                                                         | 67.97                                                             | AT-HB                    | predicted protein          |
| lmctg_0898_v2_T000001              | 5.31                                                          | 62.19                                                             | AT-HB                    | putative SSP-encoding gene |
| lmctg_1467_v2_T000001              | 11.85                                                         | 61.03                                                             | AT-B                     | predicted protein          |
| lmctg_1228_v2_T000001              | 4.62                                                          | 55.76                                                             | AT-B                     | putative SSP-encoding gene |
| lmctg_0105_v2_egn2_Lema_P012060.1  | 2.97                                                          | 30.18                                                             | AT-HB                    | putative SSP-encoding gene |
| AT10_ext_SuperContig_10_G00134     | 7.74                                                          | 17.45                                                             | AT-HB                    | putative SSP-encoding gene |
| AvrLm1                             | 5.60                                                          | 16.93                                                             | AT-HB                    | AvrLm1                     |
| lmctg_1214_v2_egn4_Lema_P086290.1  | 8.80                                                          | 16.83                                                             | AT-HB                    | AvrLm4-7                   |
| lmctg_1031_v2_egn4_Lema_P076380.1  | 8.72                                                          | 14.56                                                             | AT-B                     | putative SSP-encoding gene |
| AT15_ext_SuperContig_5_3           | 5.97                                                          | 11.45                                                             | AT-HB                    | putative SSP-encoding gene |
| lmctg_0732_v2_egn4_Lema_P056150.1  | 5.92                                                          | 9.17                                                              | GC                       | hypothetical protein       |
| lmctg_1311_v2_T000008              | 2.24                                                          | 8.98                                                              | AT-HB                    | predicted protein          |
| lmctg_0448_v2_egn4_Lema_uP030130.1 | 2.41                                                          | 8.91                                                              | GC                       | putative SSP-encoding gene |
| lmctg_1212_v2_T000025              | 3.89                                                          | 8.30                                                              | GC                       | predicted protein          |
| lmctg_1451_v2_egn4_Lema_P103310.1  | 2.12                                                          | 8.14                                                              | GC                       | candidate b-1,4-xylanase   |
| lmctg_1229_v2_egn4_Lema_P086540.1  | 3.00                                                          | 8.04                                                              | AT-HB                    | similar to Six5            |
| lmctg_0898_v2_egn4_Lema_uP067380.1 | 2.43                                                          | 6.94                                                              | GC                       | putative SSP-encoding gene |
| lmctg_0122_v2_egn4_Lema_P013520.1  | 2.71                                                          | 5.96                                                              | GC                       | candidate b-fructosidase   |
| lmctg_0610_v2_egn4_Lema_P045240.1  | 2.28                                                          | 5.93                                                              | GC                       | similar to oxidase         |

|                                    |      |      |       |                                                         |
|------------------------------------|------|------|-------|---------------------------------------------------------|
| lmctg_0810_v2_egn4_Lema_P060230.1  | 3.05 | 5.84 | GC    | similar to monosaccharide transporter                   |
| lmctg_0810_v2_egn4_Lema_P060220.1  | 2.32 | 5.48 | GC    | similar to sugar transporter                            |
| lmctg_0034_v2_egn4_Lema_uP003730.1 | 2.09 | 4.81 | GC    | putative SSP-encoding gene                              |
| lmctg_1464_v2_egn4_Lema_P106060.1  | 2.41 | 4.79 | GC    | putative SSP-encoding gene                              |
| lmctg_0869_v2_egn4_Lema_P062620.1  | 8.21 | 4.75 | GC    | predicted protein                                       |
| lmctg_0550_v2_T000028              | 1.85 | 4.69 | AT-HB | predicted protein                                       |
| lmctg_1143_v2_egn4_Lema_uP081640.1 | 6.17 | 4.64 | GC    | putative SSP-encoding gene                              |
| lmctg_1459_v2_egn4_Lema_uP104510.1 | 8.59 | 4.52 | AT-HB | predicted protein                                       |
| lmctg_1624_v2_egn4_Lema_P123310.1  | 3.29 | 4.49 | GC    | predicted protein                                       |
| lmctg_0347_v2_egn4_Lema_P024400.1  | 3.14 | 4.05 | GC    | hypothetical protein                                    |
| lmctg_0978_v2_egn4_Lema_P074930.1  | 3.10 | 3.95 | GC    | putative SSP-encoding gene                              |
| lmctg_1325_v2_egn4_Lema_P095680.1  | 5.75 | 3.93 | GC    | similar to cytochrome P450                              |
| lmctg_0572_v2_egn4_Lema_P040750.1  | 2.31 | 3.66 | GC    | predicted protein                                       |
| lmctg_1517_v2_egn4_Lema_P113080.1  | 1.96 | 3.40 | AT-B  | predicted protein                                       |
| lmctg_1500_v2_T000029              | 3.49 | 3.20 | GC    | predicted protein                                       |
| lmctg_0245_v2_egn4_Lema_P019510.1  | 3.56 | 3.19 | GC    | similar to putative short-chain dehydrogenase/reductase |
| lmctg_1250_v2_egn4_Lema_P090200.1  | 9.99 | 3.01 | GC    | hypothetical protein                                    |
| lmctg_0600_v2_egn4_Lema_P044140.1  | 1.78 | 2.97 | GC    | hypothetical protein                                    |
| lmctg_1453_v2_egn4_Lema_P104010.1  | 1.73 | 2.80 | GC    | hypothetical protein                                    |
| lmctg_1149_v2_egn4_Lema_P082080.1  | 2.22 | 2.76 | GC    | hypothetical protein                                    |
| lmctg_1420_v2_egn4_Lema_P101410.1  | 1.90 | 2.71 | GC    | predicted protein                                       |
| lmctg_0573_v2_egn4_Lema_uP040760.1 | 2.44 | 2.69 | GC    | predicted protein                                       |
| lmctg_0204_v2_egn4_Lema_uP017270.1 | 1.88 | 2.68 | GC    | predicted protein                                       |
| lmctg_0347_v2_egn4_Lema_P024460.1  | 3.60 | 2.67 | GC    | hypothetical protein                                    |
| lmctg_0901_v2_egn4_Lema_P068620.1  | 2.95 | 2.57 | GC    | similar to hemolysin-III family protein                 |

|                                    |      |      |       |                                              |
|------------------------------------|------|------|-------|----------------------------------------------|
| lmctg_0869_v2_egn4_Lema_P062610.1  | 4.59 | 2.56 | GC    | predicted protein                            |
| lmctg_1613_v2_egn4_Lema_P121760.1  | 1.51 | 2.52 | GC    | predicted protein                            |
| lmctg_1212_v2_egn4_Lema_uP086140.1 | 3.58 | 2.51 | GC    | predicted protein                            |
| lmctg_0024_v2_egn4_Lema_P002220.1  | 1.83 | 2.50 | GC    | predicted protein                            |
| lmctg_1633_v2_T000001              | 2.00 | 2.48 | AT-B  | putative SSP-encoding gene                   |
| lmctg_1259_v2_egn4_Lema_P091270.1  | 2.57 | 2.34 | GC    | candidate cell-wall active enzyme            |
| lmctg_1508_v2_egn4_Lema_P112670.1  | 1.66 | 2.27 | GC    | hypothetical protein                         |
| lmctg_1626_v2_egn4_Lema_uP123840.1 | 1.63 | 2.24 | AT-HB | predicted protein                            |
| lmctg_0442_v2_egn4_Lema_P029790.1  | 2.22 | 2.20 | GC    | predicted protein                            |
| lmctg_0758_v2_egn4_Lema_P058140.1  | 3.77 | 2.20 | AT-B  | similar to transporter                       |
| lmctg_0089_v2_egn4_Lema_P009780.1  | 1.94 | 2.20 | GC    | putative SSP-encoding gene                   |
| lmctg_0757_v2_egn4_Lema_P058120.1  | 1.73 | 2.20 | GC    | hypothetical protein                         |
| lmctg_0562_v2_egn4_Lema_uP038240.1 | 1.77 | 2.14 | AT-HB | predicted protein                            |
| lmctg_0620_v2_egn4_Lema_P046190.1  | 2.58 | 2.10 | GC    | candidate endo-1,4-b-glucanase               |
| lmctg_0587_v2_egn4_Lema_uP042640.1 | 1.76 | 2.08 | GC    | predicted protein                            |
| lmctg_1244_v2_egn4_Lema_uP088760.1 | 1.64 | 1.97 | GC    | predicted protein                            |
| lmctg_1532_v2_egn4_Lema_P115030.1  | 1.78 | 1.90 | GC    | similar to cupin 2 domain-containing protein |
| lmctg_0236_v2_egn4_Lema_P018900.1  | 1.54 | 1.82 | GC    | putative SSP-encoding gene                   |
| lmctg_0560_v2_egn4_Lema_uP037580.1 | 2.62 | 1.80 | GC    | predicted protein                            |
| lmctg_0197_v2_egn4_Lema_P017020.1  | 2.18 | 1.73 | GC    | hypothetical protein                         |
| lmctg_1691_v2_T000001              | 1.67 | 1.73 | AT-B  | predicted protein                            |
| lmctg_1461_v2_egn4_Lema_P105130.1  | 1.85 | 1.73 | GC    | similar to zinc-binding oxidoreductase       |
| lmctg_1042_v2_egn4_Lema_P077130.1  | 1.69 | 1.73 | GC    | hypothetical protein                         |
| lmctg_0898_v2_egn4_Lema_P067360.1  | 1.69 | 1.66 | GC    | hypothetical protein                         |

|                                   |      |      |    |                                                        |
|-----------------------------------|------|------|----|--------------------------------------------------------|
| lmctg_0347_v2_egn4_Lema_P024250.1 | 2.14 | 1.59 | GC | similar to mechanosensitive ion channel family protein |
|-----------------------------------|------|------|----|--------------------------------------------------------|

---

<sup>a</sup> The silenced-*LmHP1* transformant showed 35% residual expression of *LmHP1*; the silenced-*LmDIM5* transformant showed 16% residual expression of *LmDIM5* compared to wild type.

<sup>b</sup> Genes with more than 1.5-fold change in transcript level in axenic culture and an associated *p* value of <0.05 were considered as significantly up-regulated in the silenced-*LmDIM5* or in the silenced-*LmHP1* transformants compared to wild type.

<sup>c</sup> GC refers to GC-isochores; AT-HB refers to AT-isochores; AT-B refers to the 859 ( $\pm$ 385) bp transition region between AT-isochores and GC-isochores.
