# Supplementary material for: Epigenetic Control of Effector Gene Expression in the Plant Pathogenic Fungus Leptosphaeria maculans
Source: PubMed Central journal article supplement (PMC3945186; doi:10.1371/journal.pgen.1004227), 2014-03-06
Supplement: pgen.1004227.s007.pdf [file pgen.1004227.s007.pdf]

**Table S6.** Number of sequences generated and exploitable following TAIL-PCR experiments on transformants v29.3.1-*AvrLm1*, v29.3.1-*AvrLm6*, v29.3.1-*LmCys2* and NzT4-*AvrLm4-7*

| Transformants          | Number of transformants tested | Number of sequences generated | Number of exploitable sequences <sup>a</sup> |
|------------------------|--------------------------------|-------------------------------|----------------------------------------------|
| v29.3.1- <i>AvrLm1</i> | 11                             | 4                             | 3                                            |
| v29.3.1- <i>AvrLm6</i> | 13                             | 10                            | 3                                            |
| v29.3.1- <i>LmCys2</i> | 15                             | 3                             | 2                                            |
| NzT4- <i>AvrLm4-7</i>  | 27                             | 19                            | 8                                            |
| Total                  | 66                             | 36                            | 16                                           |

<sup>a</sup> Number of sequences which had a unique BLAST hit in the genome of *L. maculans* and that were not redundant.
