# Supplementary material for: Epigenetic Control of Effector Gene Expression in the Plant Pathogenic Fungus Leptosphaeria maculans
Source: PubMed Central journal article supplement (PMC3945186; doi:10.1371/journal.pgen.1004227), 2014-03-06
Supplement: pgen.1004227.s008.pdf [file pgen.1004227.s008.pdf]

**Table S7.** Characteristics of the sequences obtained by TAIL-PCR

| Transformants             | SC <sup>a</sup> | Isochore type | Location of the insertion                                |
|---------------------------|-----------------|---------------|----------------------------------------------------------|
| v29.3.1- <i>AvrLm1-4</i>  | 4               | GC            | Gene encoding for a protein overexpressed during meiosis |
| v29.3.1- <i>AvrLm1-8</i>  | 0               | GC            | Gene encoding for a glycosyl hydrolase                   |
| v29.3.1- <i>AvrLm1-12</i> | 8               | GC            | Gene encoding for a nuclear GTP binding protein          |
| v29.3.1- <i>AvrLm6-4</i>  | 21              | GC            | Gene with no homology                                    |
| v29.3.1- <i>AvrLm6-5</i>  | 0               | GC            | Gene encoding for a protein kinase                       |
| v29.3.1- <i>AvrLm6-11</i> | 2               | GC            | Gene encoding for a AMP deaminase                        |
| v29.3.1- <i>LmCys2-4</i>  | 21              | GC            | Gene encoding for a hypothetical protein                 |
| v29.3.1- <i>LmCys2-15</i> | 23              | GC            | Gene encoding for an allantoin permease                  |
| NzT4- <i>AvrLm4-7-3</i>   | 4               | GC            | Intergenic region                                        |
| NzT4- <i>AvrLm4-7-7</i>   | 18              | GC            | Intergenic region                                        |
| NzT4- <i>AvrLm4-7-16</i>  | 7               | GC            | Intergenic region                                        |
| NzT4- <i>AvrLm4-7-18</i>  | 3               | GC            | Gene encoding for a glycosyl hydrolase                   |
| NzT4- <i>AvrLm4-7-25</i>  | 10              | GC            | Intergenic region                                        |
| NzT4- <i>AvrLm4-7-27</i>  | 1               | GC            | Gene encoding for a hypothetical protein                 |
| NzT4- <i>AvrLm4-7-28</i>  | 6               | GC            | Promoter of a gene encoding for an aquaporine            |
| NzT4- <i>AvrLm4-7-9</i>   | 10              | GC            | Promoter of a gene with no homology                      |

<sup>a</sup>SC: Super Contig.
