# Supplementary material for: Epigenetic Control of Effector Gene Expression in the Plant Pathogenic Fungus Leptosphaeria maculans
Source: PubMed Central journal article supplement (PMC3945186; doi:10.1371/journal.pgen.1004227), 2014-03-06
Supplement: pgen.1004227.s009.pdf [file pgen.1004227.s009.pdf]

**Table S8.** List of PCR primers used in this study

| Primers (5'-3')     |                                              |
|---------------------|----------------------------------------------|
| <b>TAIL-PCR</b>     |                                              |
| pZPnat1-LB1         | GTAAAGCCTGGGGTGCCTAATGAG                     |
| pZPnat1-LB2         | CAGTCGGGAAACCTGTCGT                          |
| pZPnat1-LB3         | GGCGGTTTGCCTATTGG                            |
| pBht2-LB1           | GGGTTCTATAGGGTTTTGCTCATG                     |
| pBht2-LB2           | CATGTGTTTGAGCATATAAGAAACCCT                  |
| pBht2-LB3           | GAATTAATTCGGCGTTAATTCAGT                     |
| pBBH-LB1            | CGGCTATTGGTAATAGGACTGG                       |
| pBBH-LB2            | CAACCCTCAACTGGAAACGGGCCGGA                   |
| pBBH-LB3            | TCCAGGGCGTGTGCCAGGTGC                        |
| AD2                 | AGWGNAGWANCAWAGC                             |
| <b>RACE-PCR</b>     |                                              |
| HP1-5UTRL1          | GACTCCATTGCTTCTCCTGCTTTGG                    |
| HP1-5UTRL2          | CCCTTCCGCTTTTGTCCGCCCTTGG                    |
| HP1-3UTRU1          | CCAAAGCAGGAGAAGCAATGGAGTC                    |
| HP1-3UTRU2          | GAGCCACCTCGTCTTCACGCACCC                     |
| DIM5-5UTRL1         | GCTGCGACCCATCTGCGGAGAG                       |
| DIM5-5UTRL2         | CGTAGCCTGAGATGTAGCGGAAGC                     |
| DIM5-3UTRU1         | CGAGGTGAGATTATTACCGACGCC                     |
| DIM5-3UTRU2         | GTGTCCTACAACAAGCACGACCCG                     |
| <b>q-RT-PCR</b>     |                                              |
| <i>AvrLm1</i>       | GGCCAAAACAGCAGATAAT<br>AGGCCATAGCGTAGAAGGTA  |
| <i>AvrLm6</i>       | AAACGGCACTATTACGAAAA<br>GATTAGGCGAGAAGCAAGT  |
| <i>AvrLm4-7</i>     | GCCCTGCATAACTACCGAC<br>TCCTGGCCAAATATAACTCC  |
| <i>LmCys2</i>       | TCTACTGCCAGGACACAGAC<br>ATGAAGCGGAGAATGAGAAT |
| <i>β-tubulin-RT</i> | AAGAACTCATCCTACTTCGA<br>TGAATAGCTCCTGAATGG   |
| <i>actin-RT</i>     | AGTGCGATGTGATGTCAG<br>AAGAGCGGTGATTTCTTCT    |
| <i>LmHP1</i>        | TTCGACACACCAAGTATG<br>AGTAGGCTCGCTTAGAATCG   |
| <i>LmDIM5</i>       | CGGACACATAACAATGGTG<br>TGATGGTAATACGGGGAGTA  |
| <i>β-tubulin</i>    | AAGAACTCATCCTACTTCGA<br>TGAATAGCTCCTGAATGG   |

*actin* AGTGCGATGTCGATGTCAG  
AAGAGCGGTGATTCCTTCT

**Construction for  
pPZPnat1-LmHP1 and  
pPZPnat1-LmDIM5  
vectors**

---

|                       |                                 |
|-----------------------|---------------------------------|
| SilentLmHP1-HindIII+  | AAGCTTGCCACCCATTTCCCCGAGGACAGC  |
| SilentLmHP1-BamHI-    | CCACGTCACTAGACCGACCAAGG         |
| SilentLmHP1-BamHI+    | GGATCCGACTCCATTGCTTCTCCTGCTTTGG |
| SilentLmHP1-EcoRI-    | GAATTCGCCACCCATTTCCCCGAGGACAGC  |
| SilentLmDIM5-HindIII+ | AAGCTTCCATCAACTCAGTTCCCACCCCG   |
| SilentLmDIM5-BamHI-   | GGATCCGTCCACTGCTCAGGTCCAAAGCC   |
| SilentLmDIM5-BamHI+   | GGATCCGGCGTCGGTAATAATCTCACCTCG  |
| SilentLmDIM5-XmaI-    | CCCGGGCCATCAACTCAGTTCCCACCCCG   |

**Construction for  
pBht2-LmHP1-GFP  
vector**

---

|               |                               |
|---------------|-------------------------------|
| LmHP1-EcoRI   | GAATTCCTGGGCTTATTCGGTACTG     |
| LmHP1-XbaI    | TCTAGAGCGAGATGCATGCTCAACGAC   |
| eGFP-Clal     | ATCGATATGGTGAGCAAGGGCGAGGAG   |
| C-eGFP-SpeI   | ACTAGTTTACTTGTACAGCTCGTCCATGC |
| C- LmHP1-Clal | ATCGATGTAAGCATCGTCCATGGTGAGG  |
| C- LmHP1-SpeI | ACTAGTGCCATCGCAATTGAGCC       |

**ChIP-qPCR**

---

|               |                                                 |
|---------------|-------------------------------------------------|
| AvrLm4-7      | GCCCTGCATAACTACCGAC<br>TCCTGGCCAAATATAACTCC     |
| AvrLm1        | GGCCAAAACAGCAGATAAT<br>AGGCCATAGCGTAGAAGGTA     |
| AvrLm4-7_PROM | TCGCTAAGCTTGCAAACG<br>AGCTTCCATGTAGAGTAGCTTTCC  |
| AvrLm1_PROM   | TAATCCATTCTCACCTCGTGG<br>TAGTACTTACGAAGGATGGGAG |
| H2A           | ATGACTGGAGGCAAGTCCGGAG<br>AGACTTGTTTTCGCGTGCGCC |

---
